# Supplementary material for: Co-crystal formation between 2-amino-4,6-dimethylpyrimidine and new p-xylylene-bis(thioacetic) acid
Source: Royal Society of Chemistry journal article supplement (doi:10.1039/c4ce01567c), 2014-01-01
Supplement: c4ce01567c1.pdf [file c4ce01567c1.pdf]

## Supplementary Material (ESI) for CrystEngComm

### Co-crystal formation between 2-amino-4,6-dimethylpyrimidine and new *p*-xylylene-bis(thioacetic) acid

A. Ostasz<sup>a</sup>, R. Łyszczek<sup>a</sup>, L. Mazur<sup>a</sup>, B. Tarasiuk<sup>b</sup>

<sup>a</sup>Department of General and Coordination Chemistry, Faculty of Chemistry, Maria Curie-Skłodowska University, M.C. Skłodowska Sq. 2, 20-031 Lublin, Poland;

<sup>b</sup>Department of Organic Chemistry, Faculty of Chemistry, Maria Curie-Skłodowska University, M.C. Skłodowska Sq. 2, 20-031 Lublin, Poland;

\*Correspondence autor: email: [a.ostasz@poczta.umcs.lublin.pl](mailto:a.ostasz@poczta.umcs.lublin.pl)

The selected bond distances and angles are presented in Table S1 for the structures described in the present work.

Detailed peaks assignment for the free co-formers and each co-crystal is given in Table S2.

**Table S1** Selected geometric parameters for *p*-XBTA acid and its co-crystals

| <i>p</i> -XBTA          |          | co-1   |          | co-2   |          | co-3   |          |
|-------------------------|----------|--------|----------|--------|----------|--------|----------|
| <i>bond lengths / Å</i> |          |        |          |        |          |        |          |
| C1–O1                   | 1.322(2) | C1–O1  | 1.310(3) | C1–O1  | 1.309(3) | C1–O1  | 1.323(2) |
| C1–O2                   | 1.222(2) | C1–O2  | 1.225(3) | C1–O2  | 1.222(3) | C1–O2  | 1.219(2) |
| C1–C2                   | 1.504(2) | C1–C2  | 1.518(3) | C1–C2  | 1.513(4) | C1–C2  | 1.504(2) |
| C2–S1                   | 1.815(1) | C2–S1  | 1.821(2) | C2–S1  | 1.820(3) | C2–S1  | 1.814(2) |
| C3–S1                   | 1.827(1) | C3–S1  | 1.834(2) | C3–S1  | 1.832(3) | C3–S1  | 1.828(2) |
| C3–C4                   | 1.504(2) | C3–C4  | 1.509(3) | C3–C4  | 1.512(4) | C3–C4  | 1.502(2) |
|                         |          | C7–N2  | 1.337(3) | C7–N2  | 1.344(4) | C7–N2  | 1.336(3) |
|                         |          | C7–N1  | 1.361(3) | C7–N1  | 1.355(3) | C7–N1  | 1.357(2) |
|                         |          | C7–N3  | 1.359(3) | C7–N3  | 1.362(4) | C8–N1  | 1.347(2) |
|                         |          | C8–N3  | 1.337(3) | C8–N3  | 1.345(3) | C8–C9  | 1.384(2) |
|                         |          | C8–C9  | 1.404(3) | C8–C9  | 1.395(4) | C8–C10 | 1.496(2) |
|                         |          | C8–C11 | 1.499(3) | C8–C11 | 1.501(4) |        |          |
|                         |          | C9–C10 | 1.380(3) | C9–C10 | 1.388(4) |        |          |

|                                                                                   |          |                        |          |             |          |                          |          |
|-----------------------------------------------------------------------------------|----------|------------------------|----------|-------------|----------|--------------------------|----------|
|                                                                                   | C10–N1   | 1.360(3)               | C10–N1   | 1.356(3)    |          |                          |          |
|                                                                                   | C10–C12  | 1.501(3)               | C10–C12  | 1.495(4)    |          |                          |          |
| <i>bond angles /°</i>                                                             |          |                        |          |             |          |                          |          |
| O2–C1–O1                                                                          | 123.7(1) | O2–C1–O1               | 124.7(2) | O2–C1–O1    | 124.9(3) | O2–C1–O1                 | 124.4(2) |
| O2–C1–C2                                                                          | 122.2(1) | O2–C1–C2               | 122.2(2) | O2–C1–C2    | 121.9(2) | O2–C1–C2                 | 121.9(2) |
| O1–C1–C2                                                                          | 114.1(1) | O1–C1–C2               | 113.1(2) | O1–C1–C2    | 113.2(2) | O1–C1–C2                 | 113.7(1) |
| C1–C2–S1                                                                          | 110.3(1) | C1–C2–S1               | 111.7(2) | C1–C2–S1    | 110.4(2) | C1–C2–S1                 | 112.2(1) |
| C2–S1–C3                                                                          | 101.4(1) | C2–S1–C3               | 101.4(1) | C2–S1–C3    | 101.4(1) | C2–S1–C3                 | 101.6(1) |
| C4–C3–S1                                                                          | 113.6(1) | C4–C3–S1               | 114.2(2) | C4–C3–S1    | 112.9(2) | C4–C3–S1                 | 113.9(1) |
| C5–C4–C3                                                                          | 120.2(1) | C5–C4–C3               | 121.1(2) | C5–C4–C3    | 120.7(3) | C5–C4–C3                 | 121.1(2) |
| C6–C4–C3                                                                          | 121.1(1) | C6 <sup>i</sup> –C4–C3 | 121.0(2) | C6–C4–C3    | 120.4(3) | C6 <sup>ii</sup> –C4–C3  | 120.4(2) |
|                                                                                   |          | N2–C7–N3               | 118.1(2) | N2–C7–N1    | 117.3(3) | N2–C7–N1                 | 118.2(1) |
|                                                                                   |          | N2–C7–N1               | 118.0(2) | N2–C7–N3    | 118.4(3) | N1–C7–N1 <sup>iii</sup>  | 123.6(2) |
|                                                                                   |          | N3–C7–N1               | 123.9(2) | N1–C7–N3    | 124.3(3) | N1–C8–C9                 | 121.1(2) |
|                                                                                   |          | N3–C8–C9               | 122.0(2) | N3–C8–C9    | 122.3(3) | N1–C8–C10                | 116.4(2) |
|                                                                                   |          | N3–C8–C11              | 117.5(2) | N3–C8–C11   | 116.5(3) | C9–C8–C10                | 122.5(2) |
|                                                                                   |          | C9–C8–C11              | 120.4(2) | C9–C8–C11   | 121.2(3) | C8–C9–C8 <sup>iii</sup>  | 118.3(2) |
|                                                                                   |          | C10–C9–C8              | 117.9(2) | C10–C9–C8   | 118.0(3) | C8–N1–C7                 | 117.9(2) |
|                                                                                   |          | N1–C10–C9              | 120.6(2) | N1–C10–C9   | 120.4(3) |                          |          |
|                                                                                   |          | N1–C10–C12             | 116.4(2) | N1–C10–C12  | 117.1(2) |                          |          |
|                                                                                   |          | C9–C10–C12             | 122.9(2) | C9–C10–C12  | 122.5(3) |                          |          |
|                                                                                   |          | C10–N1–C7              | 118.1(2) | C7–N1–C10   | 118.3(2) |                          |          |
|                                                                                   |          | C8–N3–C7               | 117.4(2) | C8–N2–C7    | 116.7(4) |                          |          |
| <i>torsion angles /°</i>                                                          |          |                        |          |             |          |                          |          |
| O1–C1–C2–S1                                                                       | -97.1(1) | O1–C1–C2–S1            | 91.1(2)  | O1–C1–C2–S1 | 91.3(2)  | O1–C1–C2–S1              | 84.8(2)  |
| C1–C2–S1–C3                                                                       | -69.9(1) | C1–C2–S1–C3            | -72.3(2) | C1–C2–S1–C3 | -78.1(2) | C1–C2–S1–C3              | -78.4(1) |
| C2–S1–C3–C4                                                                       | -64.7(1) | C2–S1–C3–C4            | -62.5(2) | C2–S1–C3–C4 | -65.1(2) | C2–S1–C3–C4              | -63.3(1) |
| S1–C3–C4–C5                                                                       | 97.1(1)  | S1–C3–C4–C5            | 108.8(2) | S1–C3–C4–C6 | 99.0(3)  | S1–C3–C4–C6 <sup>i</sup> | 102.6(2) |
| <i>Symmetry codes: (i) 1-x, -y, 1-z ; (ii) 1/2-x, 1/2-y, 1-z ; (iii) -x, y, z</i> |          |                        |          |             |          |                          |          |

**Table S2** Bands in ATR-FTIR spectra of DMP, *p*-XBTA and co-crystals 1, 2 and 3

| Proposed assignment                                                            | DMP                      | <i>p</i> -XBTA         | co-1               | co-2               | co-3               |
|--------------------------------------------------------------------------------|--------------------------|------------------------|--------------------|--------------------|--------------------|
| $\nu(\text{OH})+\nu(\text{C-H})$                                               | -                        | 3200-2400              | -                  | -                  | -                  |
| $\nu(\text{OH})$                                                               | -                        | -                      | -                  | 3449               | -                  |
| $\nu_{\text{as}}\text{NH}_2$                                                   | 3396 <sub>m</sub>        | -                      | 3332               | 3324               | 3311               |
| $\nu_{\text{s}}\text{NH}_2$                                                    | 3306 <sub>m</sub>        | -                      | 3170               | 3192               | 3180               |
| $\nu(\text{NH})+\nu(\text{C-H})$                                               | 3181                     | -                      | 3170               | 3204               | 3179               |
| $\nu(\text{C}_{\text{ar}}-\text{H})$                                           | 3080 <sub>vw</sub>       | 3062 <sub>vw</sub>     | 3082               | 3090               | -                  |
| $\nu_{\text{as}}\text{CH}_2$                                                   | -                        | 2968                   | 2964               | 2964               | 2965               |
| $\nu_{\text{s}}\text{CH}_2$                                                    | -                        | 2947                   | -                  | -                  | 2940               |
| $\nu_{\text{as}}\text{CH}_3$                                                   | 2922                     | -                      | 2919               | 2925               | 2923               |
| $\nu_{\text{s}}\text{CH}_3$                                                    | 2850                     | -                      | 2853               | 2853               | -                  |
| $\nu(\text{OH})$                                                               | -                        | 2656,2548 <sub>w</sub> | -                  | -                  | -                  |
| $\nu(\text{C}=\text{O})$                                                       | -                        | 1686 <sub>vs</sub>     | 1683 <sub>vw</sub> | 1690 <sub>vw</sub> | 1694 <sub>m</sub>  |
| $\nu(\text{C}_{\text{Ar}}=\text{C}_{\text{Ar}})+\beta\text{NH}_{2\text{scis}}$ | 1632 <sub>s</sub>        | -                      | 1656 <sub>s</sub>  | 1646 <sub>s</sub>  | 1670 <sub>s</sub>  |
| $\nu(\text{C}_{\text{Ar}}=\text{C}_{\text{Ar}})$                               | 1590 <sub>vs</sub>       | -                      | 1597               | 1596               | 1596               |
| $\nu(\text{C}=\text{N})$                                                       | 1563 <sub>vs</sub>       | -                      | 1575               | 1575               | 1569               |
| $\nu(\text{C}_{\text{Ar}}=\text{C}_{\text{Ar}})$                               | -                        | 1510                   | 1511               | 1509               | 1511               |
| $\beta_{\text{as}}\text{CH}_3+\nu(\text{C}_{\text{Ar}}=\text{C}_{\text{Ar}})$  | 1463 <sub>vs</sub>       | 1468                   | -                  | 1471               | 1464               |
| $\beta_{\text{s}}\text{CH}_3$                                                  | 1388 <sub>s</sub>        | -                      | 1389 <sub>vw</sub> | 1385 <sub>vw</sub> | 1380 <sub>vw</sub> |
| $\beta(\text{C-H})$                                                            | 1368 <sub>s</sub>        | -                      | 1373 <sub>vw</sub> | 1372 <sub>vw</sub> | -                  |
| $\nu(\text{C-N})$                                                              | 1338 <sub>s</sub>        | -                      | 1346               | 1348 <sub>w</sub>  | 1350               |
| $\nu(\text{C-O})+\beta(\text{OH})$                                             | -                        | 1280 <sub>sb</sub>     | 1311               | 1315               | 1302               |
| $\beta\text{CH}_3$                                                             | 1242                     | -                      | 1247 <sub>w</sub>  | 1243 <sub>w</sub>  | 1248 <sub>w</sub>  |
| $\beta(\text{C-H})$                                                            | -                        | 1153                   | 1153               | 1150               | 1153               |
| $\beta(\text{C-H})$                                                            | -                        | 1126                   | 1128               | 1125               | 1131               |
| $\beta(\text{C-H})$                                                            | -                        | 1104                   | 1096               |                    | 1099               |
| $\beta(\text{CH}_3)_{\text{rock}}$                                             | 1030 <sub>m</sub> , 1008 | -                      | 1032               | 1031               | 1023               |
| $\beta\text{C-N}$                                                              | 952 <sub>m</sub>         | -                      | -                  | 957                | 957                |
| $\gamma(\text{C}_{\text{Ar}}-\text{H})$                                        | -                        | 848, 839               | 847                | 846                | 843                |
| $\gamma(\text{N-H})$                                                           | 815 <sub>w</sub>         | -                      | -                  | -                  | 816                |
| $\gamma(\text{O-H})$                                                           | -                        | 916 <sub>sb</sub>      | -                  | -                  | -                  |
| $\gamma(\text{C-H})$                                                           | 793 <sub>vs</sub>        |                        | 790                | 790                | 801, 793, 783      |
| $\gamma(\text{C-H})$                                                           | -                        | 693                    | 704                | 700                | 700                |
| $\gamma(\text{C-H})$                                                           | -                        | 669                    | 673                | 671                | 672                |

Abbreviations:

 $\nu$  - stretching vibration $\beta$  - *in-plane* deformation vibrations $\gamma$  - *out-of-plane* deformation vibrations

s: strong; m: medium; w: weak; v: very; b: broad
